# Supplementary material for: Cognitive functioning and predictors thereof in patients with 1–10 brain metastases selected for stereotactic radiosurgery
Source: Springer Nature journal article supplement (doi:10.1007/s11060-019-03292-y), 2019-09-24
Supplement: MOESM1 [file 17202992]

## Journal of Neuro-Oncology - Online Resource 1

## Cognitive functioning and predictors thereof in patients with 1-10 brain metastases selected for stereotactic radiosurgery

Wietske C.M. Schimmel, MSc<sup>1,2,3</sup>, Karin Gehring, PhD<sup>2,3</sup>, Patrick E. J. Hanssens, MD<sup>1,2</sup>, ANDMargriet M. Sitskoorn, PhD<sup>2,3</sup><sup>1</sup> Elisabeth-TweeSteden Hospital - Gamma Knife Center, Tilburg, The Netherlands<sup>2</sup> Elisabeth-TweeSteden Hospital - Department of Neurosurgery, Tilburg, The Netherlands<sup>3</sup> Tilburg University, Department of Cognitive Neuropsychology, Tilburg, The NetherlandsCorresponding author: [w.c.m.schimmel@tilburguniversity.edu](mailto:w.c.m.schimmel@tilburguniversity.edu)**Supplementary Table 1.** Correlations Between Clinical Characteristics and Patients' Cognitive Test Performance <sup>a</sup>

|                         | Number of BM | Total volume of BM | KPS           | DS-GPA | Systemic therapy (y/n) | Chemo-therapy <sup>c</sup> | Sympt / Asympt BM (0/1) | Synchr / Metachr dx of BM (0/1) | Epileptic seizures (y/n) | Time from primary cancer dx to enrollment |
|-------------------------|--------------|--------------------|---------------|--------|------------------------|----------------------------|-------------------------|---------------------------------|--------------------------|-------------------------------------------|
| HVLT-R immediate recall | .096         | -.011              | .103          | .024   | -.128                  | <b>-.234*</b>              | <b>-.236*</b>           | <b>-.284**</b>                  | -.155                    | -.015                                     |
| HVLT-R delayed recall   | .154         | -.189              | .067          | -.033  | -.089                  | <b>-.233*</b>              | -.187                   | <b>-.271**</b>                  | -.084                    | -.032                                     |
| HVLT-R recognition      | .028         | -.160              | .068          | -.073  | -.132                  | -.123                      | <b>-.260*</b>           | <b>-.299**</b>                  | -.052                    | -.089                                     |
| TMT A                   | .180         | -.099              | .024          | -.186  | -.123                  | <b>-.301**</b>             | .067                    | <b>-.260*</b>                   | -.026                    | -.190                                     |
| TMT B A <sup>b</sup>    | -.087        | -.102              | .160          | .111   | .033                   | -.024                      | -.212                   | -.195                           | .141                     | .049                                      |
| COWA                    | .121         | -.055              | .036          | .000   | -.090                  | -.112                      | -.096                   | <b>-.213*</b>                   | -.063                    | -.014                                     |
| Digit Span forward      | -.028        | -.114              | -.005         | -.050  | -.046                  | -.062                      | -.137                   | -.159                           | -.080                    | -.026                                     |
| Digit Span backward     | -.064        | <b>-.230*</b>      | .042          | -.153  | .054                   | -.059                      | <b>-.212*</b>           | -.145                           | -.185                    | .094                                      |
| Digit Symbol            | .006         | -.161              | .205          | -.089  | -.067                  | -.196                      | -.139                   | <b>-.274*</b>                   | -.009                    | -.039                                     |
| GP dominant hand        | .036         | -.127              | .140          | .052   | .043                   | -.059                      | -.107                   | -.160                           | -.145                    | .110                                      |
| GP non-dominant hand    | .036         | -.007              | <b>.301**</b> | .177   | -.151                  | -.104                      | -.080                   | <b>-.293**</b>                  | .074                     | .084                                      |

\*  $p \leq .05$ ; \*\*  $p \leq .01$ . Note. KPS = Karnofsky performance scale; BM = brain metastases; DS-GPA = diagnosis-specific graded prognostic assessment; (A)Sympt: (a)symptomatic; Synchr: synchronous; Metachr: metachronous; dx = diagnosis. <sup>a</sup> Higher z scores reflect better performance. <sup>b</sup> TMT B|A: Trails B adjusted for sex, age, educational level and Trails A. <sup>c</sup> Alone or in combination with other systemic therapies.

**Supplementary Table 2.** Correlations Between Psychological Measures <sup>a</sup> and Patients' Cognitive Test Performance <sup>b</sup>

|                         | General Fatigue | Physical Fatigue | Reduced Activity | Reduced Motivation | Mental Fatigue | Symptoms of Anxiety | Symptoms of Depression |
|-------------------------|-----------------|------------------|------------------|--------------------|----------------|---------------------|------------------------|
| HVLT-R immediate recall | -.064           | .005             | -.005            | -.091              | -.025          | .111                | .022                   |
| HVLT-R delayed recall   | -.083           | .029             | -.035            | -.108              | -.108          | .104                | .004                   |
| HVLT-R recognition      | .131            | .186             | .163             | .091               | -.006          | .131                | .143                   |
| TMT A                   | -.047           | -.034            | -.046            | -.093              | <b>-.346**</b> | -.093               | -.180                  |
| TMT B A <sup>c</sup>    | -.009           | .046             | .107             | .172               | .035           | .042                | -.117                  |
| COWA                    | .001            | .016             | -.002            | <b>-.213*</b>      | -.191          | -.084               | -.198                  |
| Digit Span forward      | -.048           | -.002            | .079             | .047               | -.098          | -.130               | -.158                  |
| Digit Span backward     | .005            | .077             | .000             | .001               | -.203          | -.143               | -.115                  |
| Digit Symbol            | -.166           | -.096            | <b>-.222*</b>    | -.189              | <b>-.288**</b> | -.211               | <b>-.318**</b>         |
| GP dominant hand        | -.102           | -.013            | -.150            | -.090              | <b>-.227*</b>  | -.114               | -.179                  |
| GP non-dominant hand    | -.106           | -.035            | <b>-.290**</b>   | <b>-.235*</b>      | <b>-.266*</b>  | -.124               | -.177                  |

\*  $p \leq .05$ ; \*\*  $p \leq .01$ . <sup>a</sup> Raw subscale scores from the Multidimensional Fatigue Inventory (MFI) and the Hospital Anxiety and Depression Scale (HADS); higher scores indicate more symptoms. <sup>b</sup> Higher z scores reflect better performance. <sup>c</sup> TMT B|A: Trails B adjusted for sex, age, educational level and Trails A.
